# Supplementary material for: Association of Missense Polymorphism in HSD3B1 With Outcomes Among Men With Prostate Cancer Treated With Androgen-Deprivation Therapy or Abiraterone
Source: PubMed Central journal article supplement (PMC6484618; doi:10.1001/jamanetworkopen.2019.0115), 2019-02-22
Supplement: jamanetwopen-2-e190115-s001.pdf [file jamanetwopen-2-e190115-s001.pdf]

## Supplementary Online Content

Shiota M, Narita S, Akamatsu S, et al. Association of missense polymorphism in *HSD3B1* with outcomes among men with prostate cancer treated with androgen-deprivation therapy or abiraterone. *JAMA Netw Open*. 2019;2(2):e190115. doi:10.1001/jamanetworkopen.2019.0115

**eTable 1.** Clinicopathological characteristics according to genetic polymorphism in patients treated with primary ADT

**eTable 2.** Clinicopathological characteristics according to genetic polymorphism in patients treated with abiraterone

This supplementary material has been provided by the authors to give readers additional information about their work.

| <b>eTable 1.</b> Clinicopathological characteristics according to genetic polymorphism in patients treated with primary ADT |                    |                                  |                                                         |         |
|-----------------------------------------------------------------------------------------------------------------------------|--------------------|----------------------------------|---------------------------------------------------------|---------|
| Gene                                                                                                                        |                    | <i>HSD3B1</i> (rs1047303)        |                                                         |         |
| Variables                                                                                                                   | All<br>(n = 104)   | Homozygous wild-type<br>(n = 95) | Heterozygous and homozygous<br>variant types<br>(n = 9) | P-value |
| Median age, years (IQR)                                                                                                     | 72 (67–76)         | 72 (67–76)                       | 73 (68–75)                                              | 0.88    |
| Median PSA at diagnosis, ng/ml (IQR)                                                                                        | 244.0 (85.5–744.3) | 240.0 (85.2–706.0)               | 274.0 (81.5–1607.5)                                     | 0.51    |
| Biopsy Gleason score, n (%)                                                                                                 |                    |                                  |                                                         |         |
| <8                                                                                                                          | 31 (32.6%)         | 28 (32.6%)                       | 3 (33.3%)                                               |         |
| ≥8                                                                                                                          | 64 (67.4%)         | 58 (67.4%)                       | 6 (66.7%)                                               | 0.96    |
| NA                                                                                                                          | 9                  | 9                                | 0                                                       |         |
| Clinical stage, n (%)                                                                                                       |                    |                                  |                                                         |         |
| cT2/3                                                                                                                       | 65 (72.2%)         | 57 (69.5%)                       | 8 (100%)                                                |         |
| cT4                                                                                                                         | 25 (27.8%)         | 25 (30.5%)                       | 0 (0.0%)                                                | 0.07    |
| NA                                                                                                                          | 14                 | 13                               | 1                                                       |         |
| Clinical stage, n (%)                                                                                                       |                    |                                  |                                                         |         |
| N0                                                                                                                          | 40 (44.0%)         | 39 (47.0%)                       | 1 (12.5%)                                               |         |
| N1                                                                                                                          | 51 (56.0%)         | 44 (53.0%)                       | 7 (87.5%)                                               | 0.06    |
| NA                                                                                                                          | 13                 | 12                               | 1                                                       |         |
| Clinical stage, n (%)                                                                                                       |                    |                                  |                                                         |         |
| M0                                                                                                                          | 10 (9.6%)          | 8 (8.4%)                         | 2 (22.2%)                                               |         |
| M1                                                                                                                          | 94 (90.4%)         | 87 (91.6%)                       | 7 (77.8%)                                               | 0.18    |
| Hormonal therapy, n (%)                                                                                                     |                    |                                  |                                                         |         |
| Combined androgen blockade                                                                                                  | 92 (88.5%)         | 83 (87.4%)                       | 9 (100%)                                                |         |
| Castration                                                                                                                  | 12 (11.5%)         | 12 (12.6%)                       | 0 (0.0%)                                                | 0.26    |
| ADT, androgen-deprivation therapy; IQR, interquartile range; NA, not available                                              |                    |                                  |                                                         |         |

| <b>eTable 2.</b> Clinicopathological characteristics according to genetic polymorphism in patients treated with abiraterone |                           |                                  |                                       |         |
|-----------------------------------------------------------------------------------------------------------------------------|---------------------------|----------------------------------|---------------------------------------|---------|
| Gene                                                                                                                        | <i>HSD3B1</i> (rs1047303) |                                  |                                       |         |
| Variables                                                                                                                   | All<br>(n = 99)           | Homozygous wild-type<br>(n = 85) | Heterozygous variant type<br>(n = 14) | P-value |
| Median age at pre-treatment, years (IQR)                                                                                    | 74 (67–80)                | 73 (67–79)                       | 74 (65–81)                            | 0.98    |
| Median PSA at diagnosis, ng/ml (IQR)                                                                                        | 77.7 (21.1–327.0)         | 77.7 (20.1–291.0)                | 84.7 (24.4–436.0)                     | 0.54    |
| Biopsy Gleason score, n (%)                                                                                                 |                           |                                  |                                       |         |
| <8                                                                                                                          | 14 (15.4%)                | 12 (15.4%)                       | 2 (15.4%)                             |         |
| ≥8                                                                                                                          | 77 (84.6%)                | 66 (84.6%)                       | 11 (84.6%)                            | 1.00    |
| NA                                                                                                                          | 8                         | 7                                | 1                                     |         |
| Median PSA at pre-treatment, ng/ml (IQR)                                                                                    | 14.7 (4.7–87.1)           | 17.2 (4.9–93.3)                  | 8.2 (3.8–48.2)                        | 0.18    |
| ECOG PS at pre-treatment, n (%)                                                                                             |                           |                                  |                                       |         |
| 0                                                                                                                           | 65 (65.7%)                | 55 (64.7%)                       | 10 (71.4%)                            |         |
| 1                                                                                                                           | 26 (26.3%)                | 23 (27.1%)                       | 3 (21.4%)                             |         |
| ≥2                                                                                                                          | 8 (8.1%)                  | 7 (8.2%)                         | 1 (7.1%)                              | 0.88    |
| Clinical M-stage at pre-treatment, n (%)                                                                                    |                           |                                  |                                       |         |
| M0                                                                                                                          | 8 (8.1%)                  | 7 (8.2%)                         | 1 (7.1%)                              |         |
| M1a                                                                                                                         | 10 (10.1%)                | 7 (8.2%)                         | 3 (21.4%)                             |         |
| M1b                                                                                                                         | 68 (68.7%)                | 60 (70.6%)                       | 8 (57.1%)                             |         |
| M1c                                                                                                                         | 13 (13.1%)                | 11 (12.9%)                       | 2 (14.3%)                             | 0.49    |
| Prior enzalutamide, n (%)                                                                                                   |                           |                                  |                                       |         |
| Absence                                                                                                                     | 53 (53.5%)                | 42 (49.4%)                       | 11 (78.6%)                            |         |
| Presence                                                                                                                    | 46 (46.5%)                | 43 (50.6%)                       | 3 (21.4%)                             | 0.04*   |
| Prior docetaxel, n (%)                                                                                                      |                           |                                  |                                       |         |
| Absence                                                                                                                     | 58 (58.6%)                | 48 (56.5%)                       | 10 (71.4%)                            |         |
| Presence                                                                                                                    | 41 (41.4%)                | 37 (43.5%)                       | 4 (28.6%)                             | 0.28    |

\*statistically significant; IQR, interquartile range; PSA, prostate-specific antigen; NA, not available; ECOG, Eastern Cooperative Oncology Group; PS, performance status
